# Supplementary material for: Spin distribution in copper(i) phosphine complexes of verdazyl radicals
Source: Royal Society of Chemistry journal article supplement (doi:10.1039/b205923c), 2002-01-01

**Winsim v.1.0, 2002**

Public EPR Software Tools  
 National Institute of Environmental Health Sciences  
 National Institutes of Health, USA  
<http://ep.rniehs.nih.gov/>

**Spectral Parameters:**

Field Center: 3357.000 G  
 Scan Range: 150.000 G  
 Data Points: 2048  
 Mod. Amp.: 0.50 G  
 Mod. Freq: 100.00 KHz

**Simulation Parameters:**

Calculation type: Simple  
 Number of Species: 1  
 Domain: CW

**Species number: 1**

Rel. conc. : 100.000 Lorentzian : 100.000  
 Line width : 1.640 G-shift : 1.330  
 Nuclei Coupling Spin Number  
 1 5.960 0.5 6  
 2 5.680 1.0 3  
 3 7.310 1.0 1  
 4 11.440 0.5 2  
 5 8.560 1.5 1

Comment: dppb+Cu+pyvd

FileName:

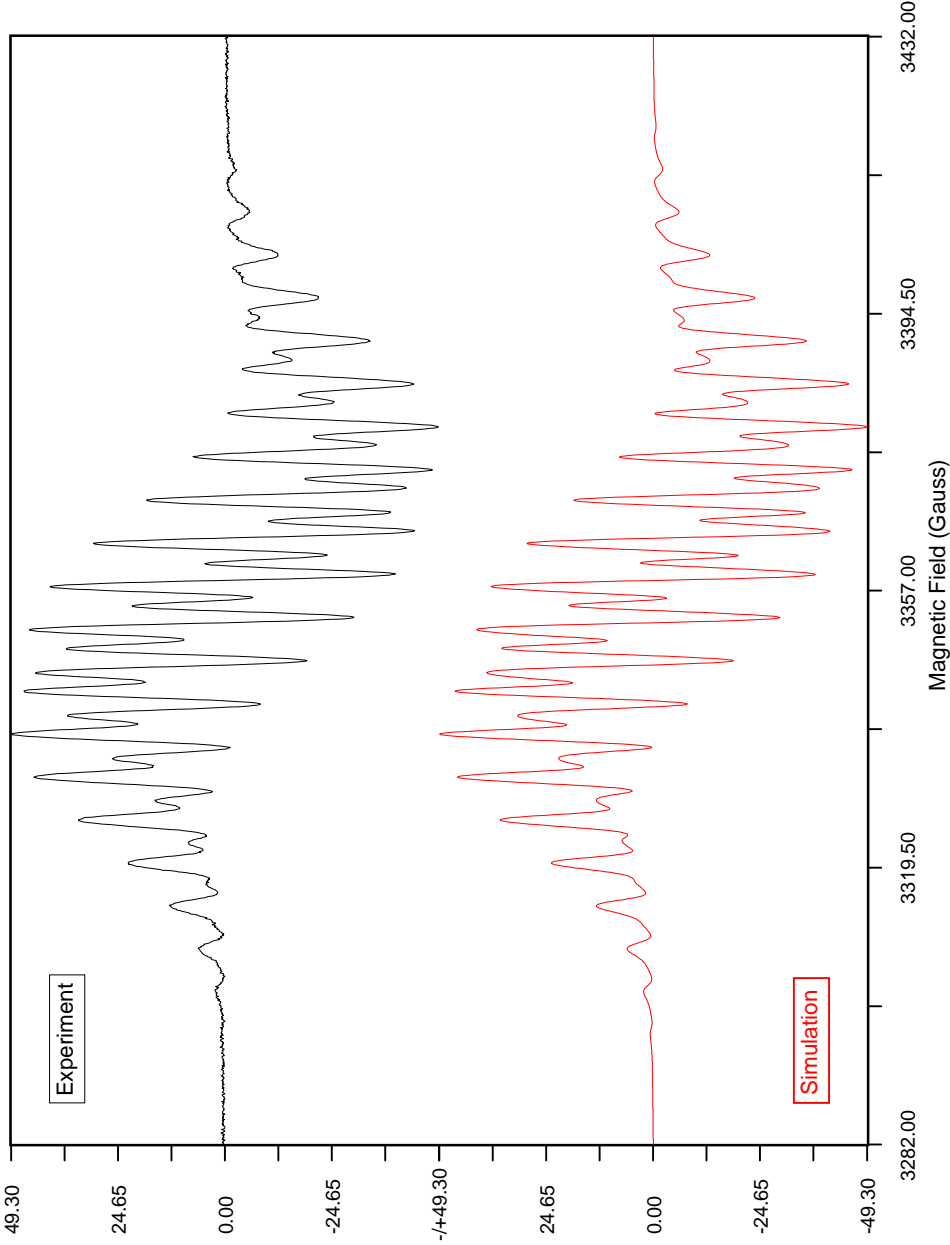

Supplement: dppb.pdf [file dppb.pdf]
