# Supplementary material for: Spin distribution in copper(i) phosphine complexes of verdazyl radicals
Source: Royal Society of Chemistry journal article supplement (doi:10.1039/b205923c), 2002-01-01

### Winsim v.1.0, 2002

Public EPR Software Tools  
National Institute of Environmental Health Sciences  
National Institutes of Health, USA  
<http://epr.niehs.nih.gov/>

#### Spectral Parameters:

Field Center: 3357.000 G  
Scan Range: 150.000 G  
Data Points: 2048  
Mod. Amp.: 0.50 G  
Mod. Freq: 100.00 KHz

#### Simulation Parameters:

Calculation type: Simple  
Number of Species: 1  
Domain: CW

Time Constant: 40.96  
Rec. Gain: 1.0e+005  
MW Freq.: 9.33 GHz  
MW Power: 0.63 mw

#### Species number: 1

Rel. conc. : 100.000 Lorentzian : 63.000  
Line width : 1.290 G-shift : 0.700  
Nuclei Coupling Spin Number  
1 14.100 0.5 2  
2 11.610 1.5 1  
3 7.480 1.0 1  
4 5.790 1.0 3  
5 5.530 0.5 6

Comment: dppe copper pyridyl verdazyl 9.42337GHz

FileName:

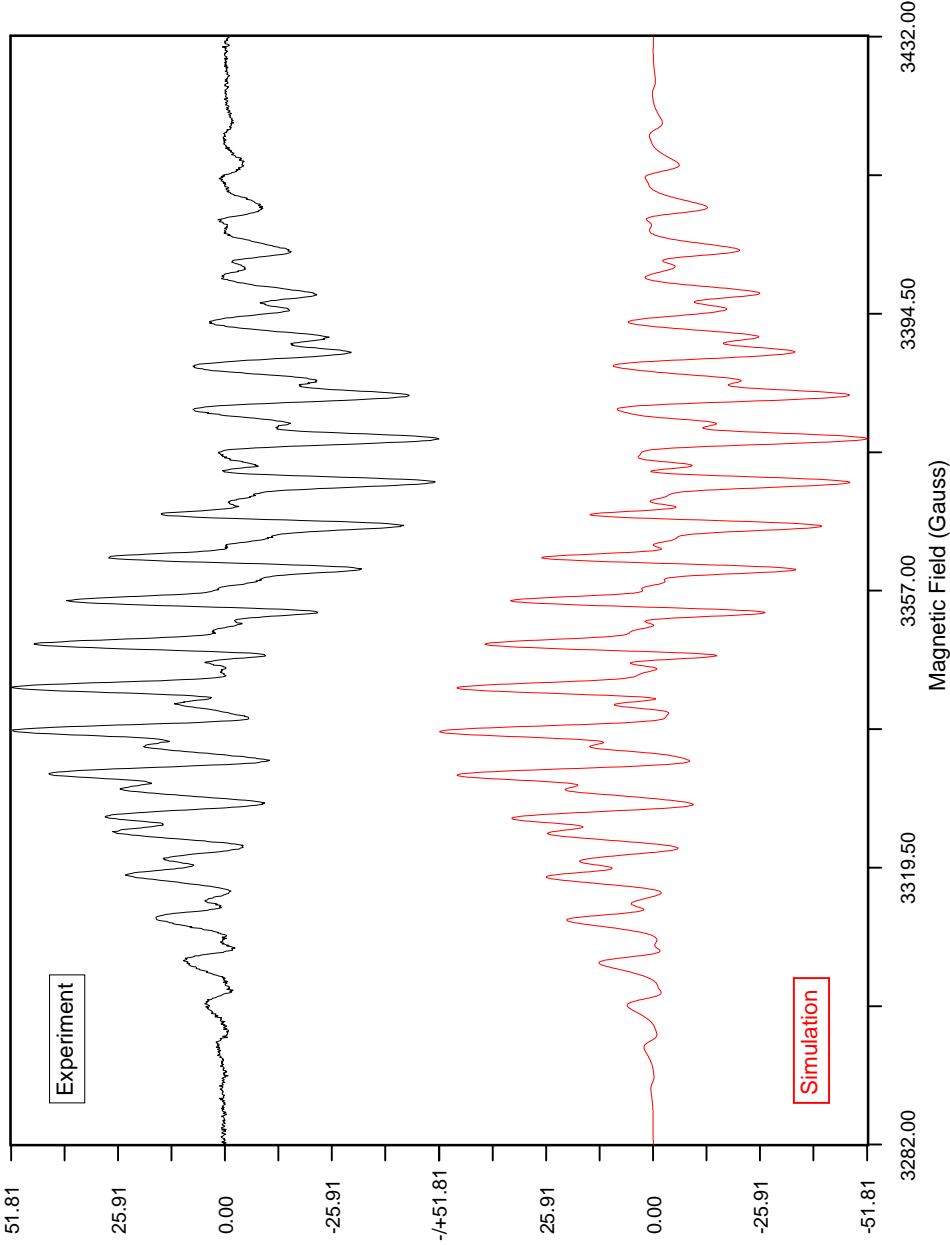

Supplement: dppe.pdf [file dppe.pdf]
