# Supplementary material for: Spin distribution in copper(i) phosphine complexes of verdazyl radicals
Source: Royal Society of Chemistry journal article supplement (doi:10.1039/b205923c), 2002-01-01

### Winsim v.1.0, 2002

Public EPR Software Tools  
National Institute of Environmental Health Sciences  
National Institutes of Health, USA  
<http://epr.niehs.nih.gov/>

#### Spectral Parameters:

Field Center: 3357.000 G  
Scan Range: 150.000 G  
Data Points: 2048  
Mod. Amp.: 0.50 G  
Mod. Freq: 100.00 KHz

#### Simulation Parameters:

Calculation type: Simple  
Number of Species: 1  
Domain: CW

Time Constant: 40.96  
Rec. Gain: 1.0e+005  
MW Freq.: 9.35 GHz  
MW Power: 1.98 mw

Comment: dpppp + Cu(MeCN)4PF6 + pyvd

#### Species number: 1

Rel. conc. : 100.000 Lorentzian : 45.000  
Line width : 1.490 G-shift : -1.620  
Nuclei Coupling Spin Number  
1 5.580 0.5 6  
2 5.680 1.0 3  
3 7.310 1.0 1  
4 14.300 0.5 2  
5 9.960 1.5 1

FileName:

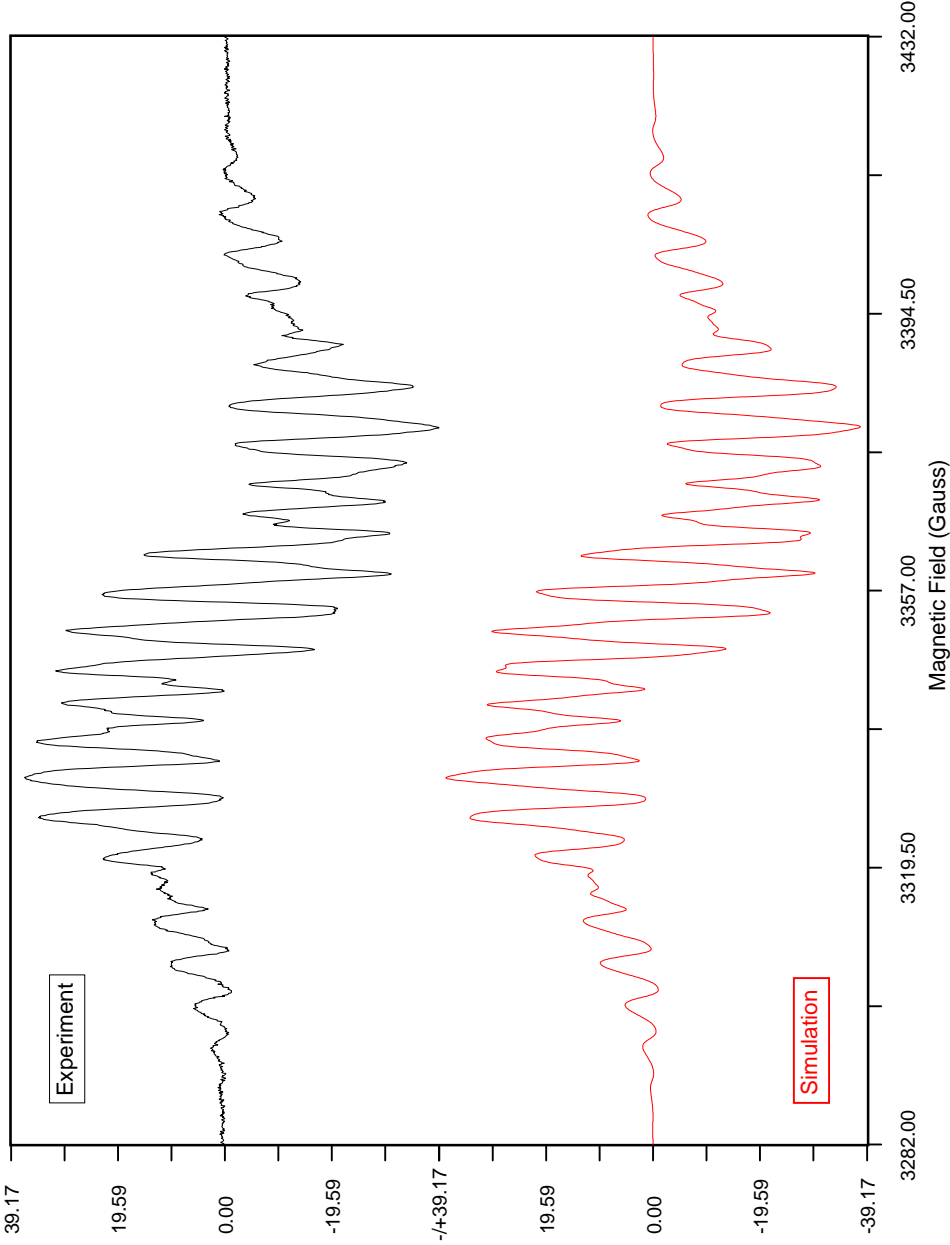

Supplement: dppp.pdf [file dppp.pdf]
