# Supplementary material for: Spin distribution in copper(i) phosphine complexes of verdazyl radicals
Source: Royal Society of Chemistry journal article supplement (doi:10.1039/b205923c), 2002-01-01

### Winsim v.1.0, 2002

Public EPR Software Tools  
National Institute of Environmental Health Sciences  
National Institutes of Health, USA  
<http://epr.niehs.nih.gov/>

#### Spectral Parameters:

Field Center: 3357.000 G  
Scan Range: 150.000 G  
Data Points: 2048  
Mod. Amp.: 0.50 G  
Mod. Freq: 100.00 KHz

#### Simulation Parameters:

Calculation type: Simple  
Number of Species: 1  
Domain: CW

Time Constant: 40.96  
Rec. Gain: 1.0e+005  
MW Freq.: 9.32 GHz  
MW Power: 1.98 mw

#### Species number: 1

|              |          |              |         |
|--------------|----------|--------------|---------|
| Rel. conc. : | 100.000  | Lorentzian : | 100.000 |
| Line width : | 1.460    | G-shift :    | 0.270   |
| Nuclei       | Coupling | Spin         | Number  |
| 1            | 6.360    | 0.5          | 6       |
| 3            | 7.610    | 1.0          | 1       |
| 4            | 12.240   | 0.5          | 2       |
| 5            | 9.010    | 1.5          | 1       |
| 7            | 5.500    | 1.0          | 3       |

Comment: triphenyl phosphite copper pyvd

FileName:

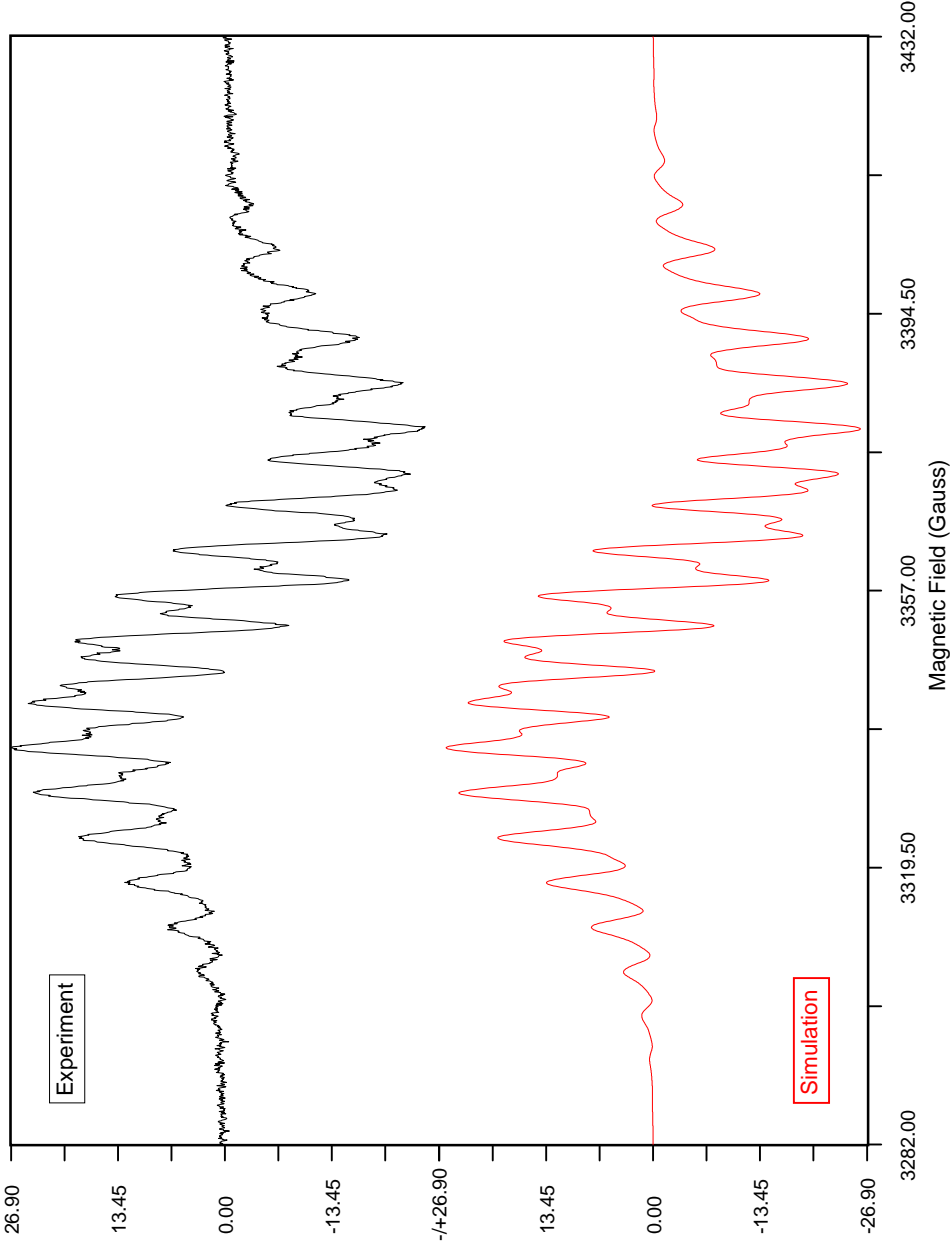

Supplement: phosphite.pdf [file phosphite.pdf]
