# Supplementary material for: Spin distribution in copper(i) phosphine complexes of verdazyl radicals
Source: Royal Society of Chemistry journal article supplement (doi:10.1039/b205923c), 2002-01-01

### Winsim v.1.0, 2002

Public EPR Software Tools  
National Institute of Environmental Health Sciences  
National Institutes of Health, USA  
<http://epr.niehs.nih.gov/>

#### Spectral Parameters:

Field Center: 3357.000 G  
Scan Range: 150.000 G  
Data Points: 2048  
Mod. Amp.: 0.50 G  
Mod. Freq: 100.00 KHz

#### Simulation Parameters:

Calculation type: Simple  
Number of Species: 1  
Domain: CW

#### Species number: 1

Rel. conc. : 100.000 Lorentzian : 100.000  
Line width : 0.830 G-shift : -0.310  
Nuclei Coupling Spin Number  
1 6.080 0.5 6  
3 5.460 1.0 3  
4 7.340 1.0 1  
7 9.730 0.5 2  
8 7.640 1.5 1

Comment: bis(trip-tolylphosphine)copper pyridyl verdazyl 9.42707GHz

FileName:

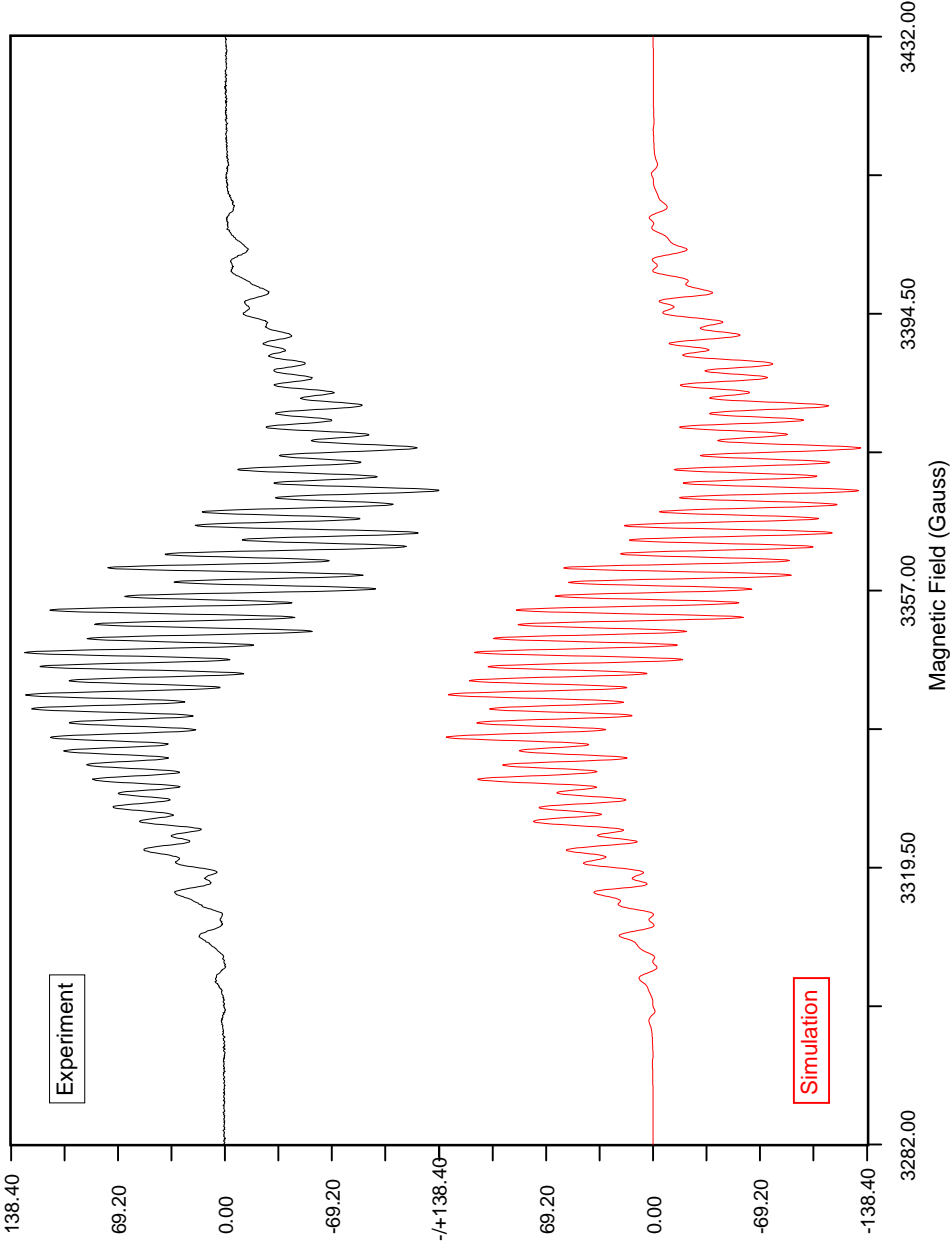

Supplement: tolyl.pdf [file tolyl.pdf]
