# Supplementary material for: Spin distribution in copper(i) phosphine complexes of verdazyl radicals
Source: Royal Society of Chemistry journal article supplement (doi:10.1039/b205923c), 2002-01-01

**Winsim v.1.0, 2002**

Public EPR Software Tools  
 National Institute of Environmental Health Sciences  
 National Institutes of Health, USA  
<http://epr.niehs.nih.gov/>

**Spectral Parameters:**

Field Center: 3345.440 G  
 Scan Range: 140.000 G  
 Data Points: 2048  
 Mod. Amp.: 0.40 G  
 Mod. Freq: 100.00 KHz

**Simulation Parameters:**

Calculation type: Simple  
 Number of Species: 1  
 Domain: CW

Time Constant: 20.48  
 Rec. Gain: 5.0e+004  
 MW Freq.: 9.30 GHz  
 MW Power: 1.98 mw

Comment: pyvd+Cu+xantphos in CH2Cl2 300 K 9.39417227 GHz

**Species number: 1**

Rel. conc. : 100.000 Lorentzian : 100.000  
 Line width : 0.600 G-shift : -1.500  
 Nuclei Coupling Spin Number  
 1 5.760 0.5 6  
 2 5.900 1.0 3  
 3 7.260 1.0 1  
 4 11.070 0.5 2  
 5 8.600 1.5 1

FileName:

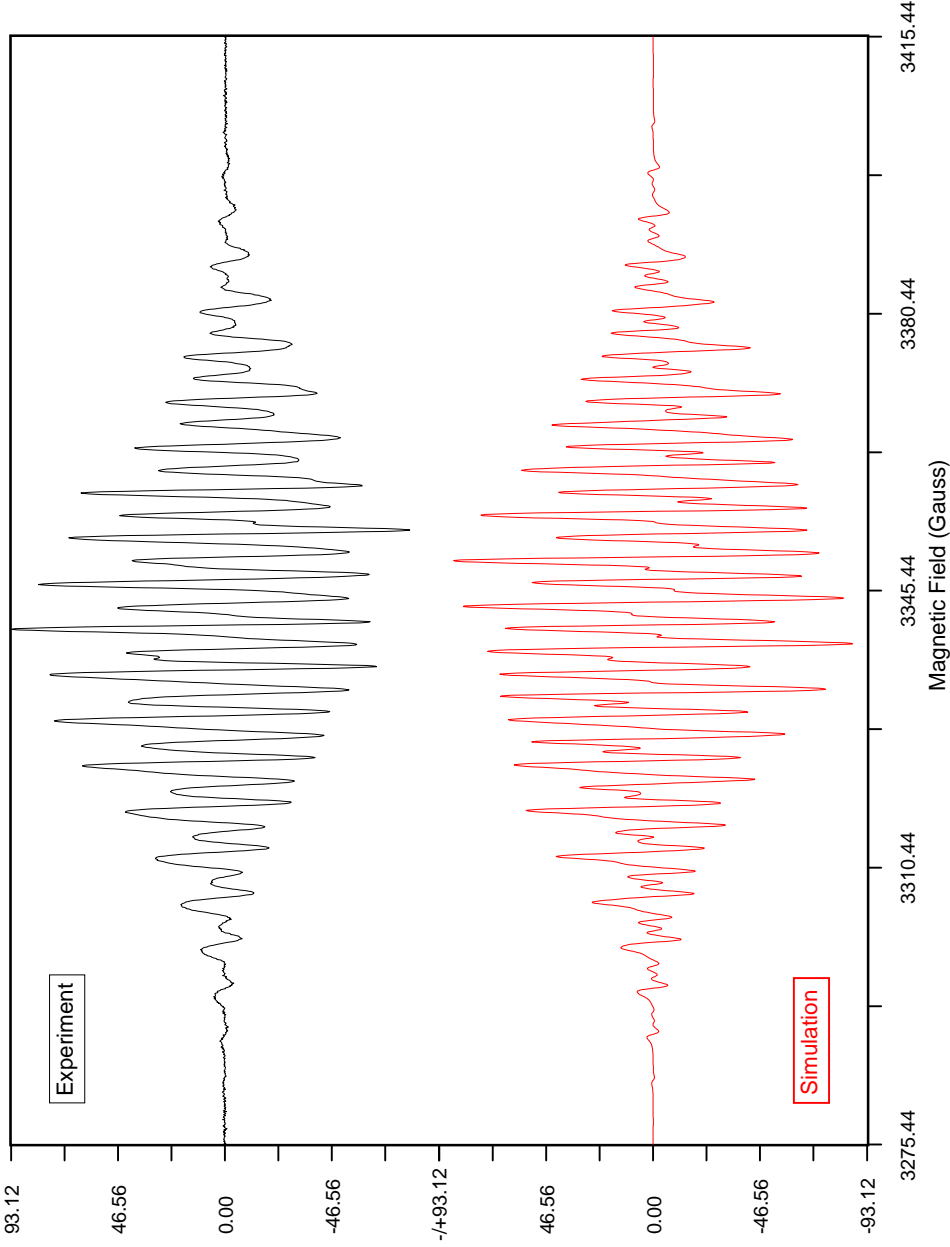

Supplement: xantphos.pdf [file xantphos.pdf]
